# Supplementary material for: Exploring the Combined Effects of Different Nitrogen Sources and Chabazite Zeolite-Tuff on Nitrogen Dynamics in an Acidic Sandy-Loam Soil
Source: MDPI journal article supplement (doi:10.3390/soilsystems8010016), 2024-01-26
Supplement: s1 [file s1]

Supplementary Material

Paper: Exploring the combined effects of different Nitrogen sources and chabazite zeolite-tuff on Nitrogen dynamics in an acidic sandy-loam soil

Journal: Soil Systems

Ferretti Giacomo<sup>1\*</sup>, Alberghini Matteo<sup>2</sup>, Galamini Giulio<sup>3</sup>, Medoro Valeria<sup>4</sup>, Faccini Barbara<sup>4</sup>, Balzan Silvia<sup>1</sup>, Coltorti Massimo<sup>4</sup>

- 1) Department of Chemical, Pharmaceutical and Agricultural Sciences, University of Ferrara, Via Luigi Borsari 46, 44121, Ferrara, Italy.
- 2) Department of Physics and Earth Science, University of Ferrara, Via Saragat 1, 44122, Ferrara, Italy.
- 3) Department of Chemical and Geological Sciences, University of Modena and Reggio Emilia, Via Giuseppe Campi 103, 41125, Modena, Italy.
- 4) Department of Environmental and Prevention Science, University of Ferrara, Via Luigi Borsari 46, 44121, Ferrara, Italy

\* Correspondence: frrgcm@unife.it

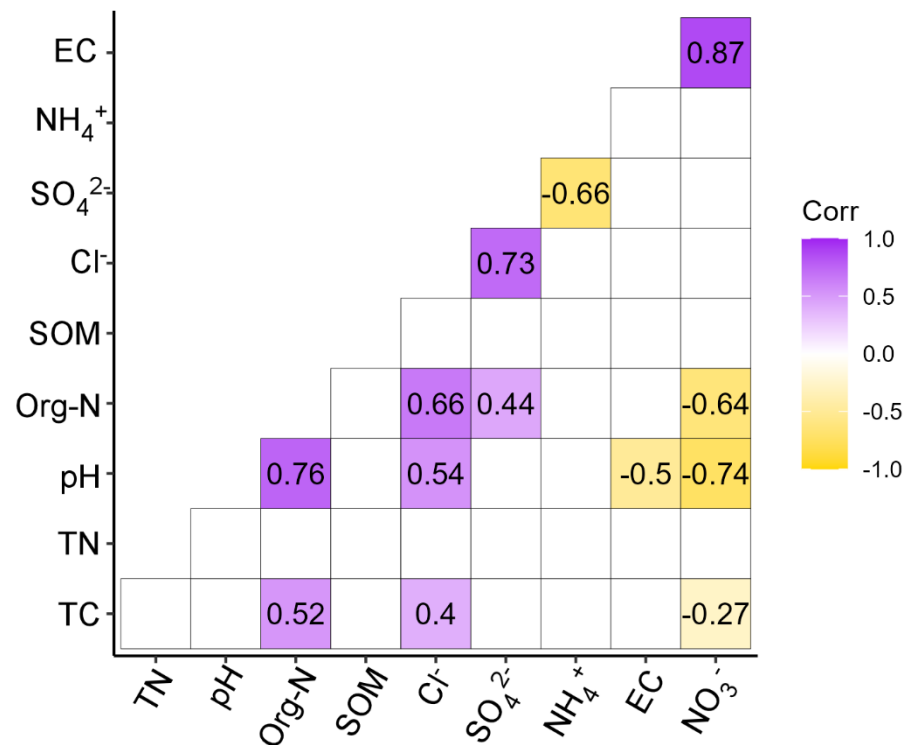

Figure S1: Correlation matrix (pearson coefficient in the box). Blank boxes are not significant correlations (p>0.05).

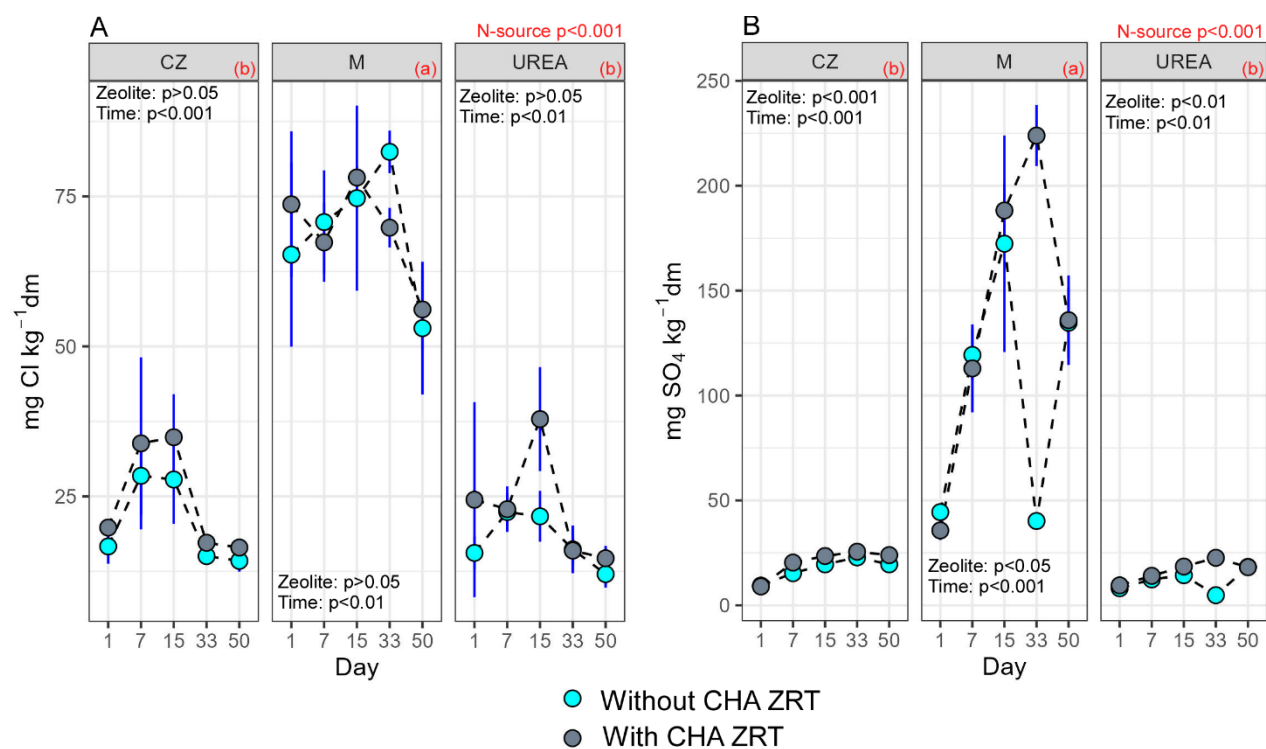

**Figure S2** Dynamics of chloride and sulphate in soil water extracts during the experimental incubation. Blue vertical lines indicate standard deviation (3 replicates). Different letters (in red) refers to significant differences between the N-sources (CZ, M and UREA). The results of the 2-way ANOVA are reported for each N-source within the respective box in terms of p-value.

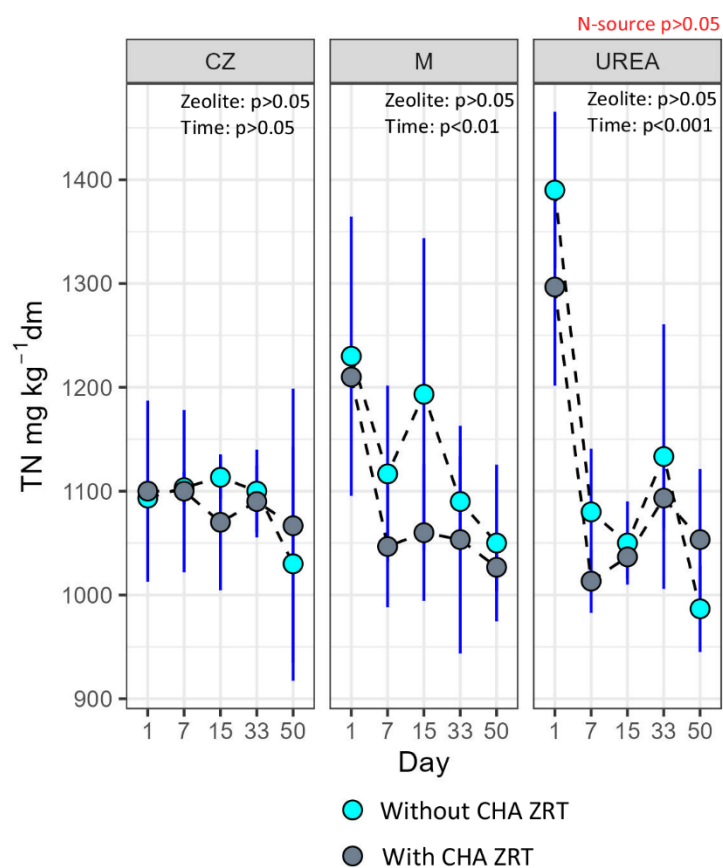

**Figure S3** Dynamics of soil total N (TN) during the incubation. Blue vertical lines indicate standard deviation (3 replicates).

The results of the 2-way ANOVA are reported for each N-source within the respective box in terms of p-value.

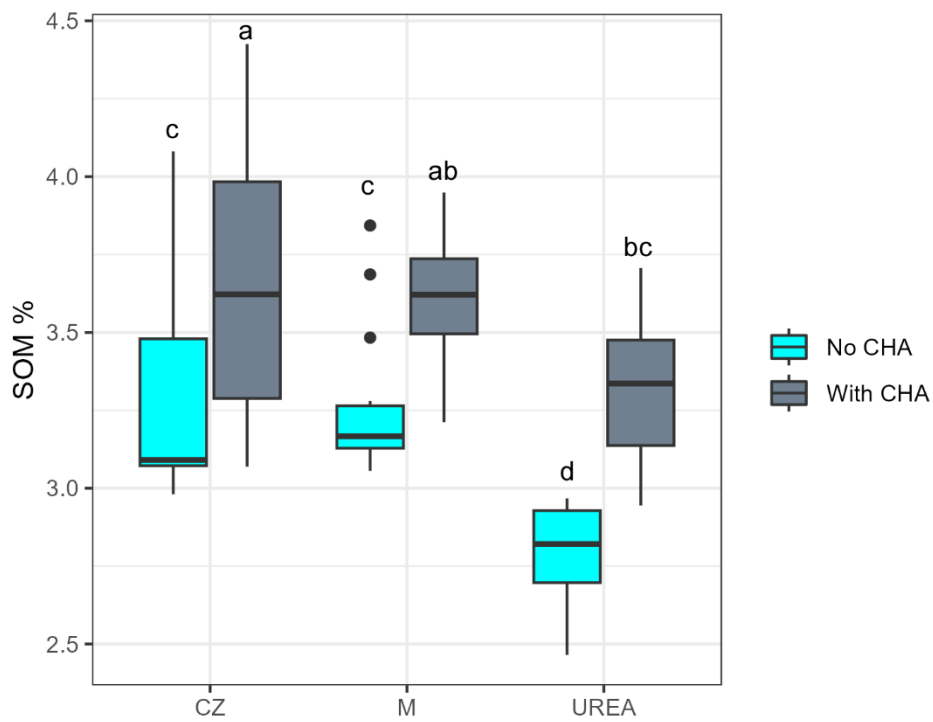

**Figure S4** Soil organic matter content of the soil samples measured after calcination at 550°C. The increase in weight loss in the samples amended with 10% of CHA zeolite tuff is evident and can be related to losses of water at temperature > 105°C overlapping weight loss due to SOM oxidation. Different letters indicate significant differences as a result of ANOVA and Tukey HSD test conducted at p=0.05.
